# Supplementary material for: Bridging Theory and Practice: A KGs-CBL Blended Framework for Enhanced Medical Imaging Education
Source: Research Square preprint supplement (doi:10.21203/rs.3.rs-8013881/v1), 2025-12-30
Supplement: Supplementary file 1 [file ed140e07e31e614e723d097d.docx]

**Date: ID: Scores:**

Questionnaire

| **□** | I have received information regarding this research and had an opportunity to ask questions. I believe I understand the purpose, extent, and possible risks of my involvement in this project and I voluntarily consent to take part. |
| --- | --- |

1. The class has facilitated mastery of the core teaching content.

□Strongly agree □Agree □Neutral □Disagree □Strongly disagree

2. The class has aided in acquiring and mastering extracurricular knowledge.

□Strongly agree □Agree □Neutral □Disagree □Strongly disagree

3. The class has enhanced my thinking and analytical abilities.

□Strongly agree □Agree □Neutral □Disagree □Strongly disagree

4. The class has boosted my interest in learning.

□Strongly agree □Agree □Neutral □Disagree □Strongly disagree

5. The class has fostered my independent learning capabilities.

□Strongly satisfied □Satisfied □Neutral □Dissatisfied □Strongly dissatisfied

6.The class has strengthened team collaboration skills.

□Strongly satisfied □Satisfied □Neutral □Dissatisfied □Strongly dissatisfied

7.The class has promoted logical thinking and expressive abilities.

□Strongly satisfied □Satisfied □Neutral □Dissatisfied □Strongly dissatisfied

8. The class has added to my learning burden.

□Strongly satisfied □Satisfied □Neutral □Dissatisfied □Strongly dissatisfied

9. Would you please give me your valuable advice on this class?
